# Supplementary material
Source: PubMed Central journal article supplement (PMC6540272)
Supplement: flgastro-2018-101007supp001.pdf [file flgastro-2018-101007supp001.pdf]

# ESPGHAN Endoscopy training survey

**\*1. Which is your country of training**

**2. What is your name of your institution (s) you have/had your PGHAN training ?  
( optional )**

**\*3. Is there any official paediatric GI training programme in your country ?**

- YES
- NO
- Other (please specify)

**\*4. Do you get a subspecialty certification ?**

- YES
- NO
- Other (please specify)

**\*5. How long is your paed GI training programme in your country?  
( months )**

# ESPGHAN Endoscopy training survey

## \*6. How much time of your current/recent training is devoted to paed GI ?

- <50%
- >50%
- 100%
- Other (please specify)

## 7. Which of the following endoscopy procedures have you or will you be trained in?

- UGI endoscopy
- Colonoscopy
- I do not plan to be trained in endoscopy
- Other (please specify)

## 8. in which year of your PGHAN training are you at the moment ?

- 1st
- 2nd
- 3rd
- 4th
- 5th
- Completed
- Other (please specify)

## ESPGHAN Endoscopy training survey

### \*9. Is your centre providing endoscopy training ?

- YES
- NO
- Other (please specify)

### \*10. At your current/recent hospital does adult ( if applicable ) gastroenterology team provide endoscopy training to paediatric trainees ?

- YES
- NO
- Other (please specify)

### \*11. At your current/recent hospital does the general adult/paediatric surgery team provide endoscopy training to paediatric trainees ?

- YES
- NO
- Other (please specify)

# ESPGHAN Endoscopy training survey

**\*12. How many endoscopies/therapeutic procedures you have done so far during your training ( approximately ) ?**

|                                       |                      |
|---------------------------------------|----------------------|
| OGDs in total                         | <input type="text"/> |
| Variceal banding                      | <input type="text"/> |
| Sclerotherapy of varices              | <input type="text"/> |
| Balloon dilatation                    | <input type="text"/> |
| Foreign body retrieval                | <input type="text"/> |
| Bravo Ph capsule                      | <input type="text"/> |
| Endoscopic placement of video capsule | <input type="text"/> |
| PEG insertion                         | <input type="text"/> |
| PEG change                            | <input type="text"/> |
| PEG-J-tube                            | <input type="text"/> |
| ERCP                                  | <input type="text"/> |
| Colonoscopies in total                | <input type="text"/> |
| polypectomy                           | <input type="text"/> |
| rectal biopsy for Hirschsprung's      | <input type="text"/> |
| stricture dilatation                  | <input type="text"/> |
| Video capsule endoscopy               | <input type="text"/> |
| Double balloon enteroscopy            | <input type="text"/> |

**\*13. How many endoscopies do you perform per week ( on average ) ?**

**\*14. How often do you intubate the terminal ileum ?**

- <50%
- 50-90%
- >90%
- Other (please specify)

# ESPGHAN Endoscopy training survey

**\*15. Have you always had continuous supervision during your endoscopy training by an experienced trainer?**

- YES
- NO
- Other (please specify)

**\*16. how many procedures needed minimum to be appraised for certification ( OGD and colonoscopy)**

OGD

Colonoscopies

**\*17. Do you keep a logbook of your endoscopic training activity ?**

- YES
- NO
- Other (please specify)

**\*18. Do you have formal assessments ( paper or online ) during your endoscopic training ?**

- YES
- NO
- Other (please specify)

# ESPGHAN Endoscopy training survey

## 19. How frequently do you get your assessments filled during your supervised endoscopic procedures ?

- Always
- Most of the time
- Half of the time
- Not so often
- never
- Other (please specify)

## \*20. Do you have a final summative assessment at the end before certification ?

- YES
- NO

Other (please specify)

## \*21. Have you attended a basic skills endoscopy course ?

OGD

Colonoscopy

YES ( in the "other" free text field-how many ? which ones ? mandatory? was it funded by whom?)

NO (please specify reason )

## 22. satisfaction of Diagnostic UGI endoscopy training

very dissatisfied =1      2      3      4      very satisfied =5      N/A

- 
- 
- 
- 
- 
- 

Other (please specify)

## 23. satisfaction of Interventional UGI endoscopy training

very dissatisfied =1      2      3      4      very satisfied = 5      N/A

- 
- 
- 
- 
- 
- 

Other (please specify)

# ESPGHAN Endoscopy training survey

## 24. Satisfaction of Lower GI endoscopy training

very dissatisfied =1

2

3

4

very satisfied =5

N/A

Other (please specify)

## \*25. Have you had endoscopy simulator training ?

YES

NO

Other (please specify)

## 26. Have you had difficulties in accessing endoscopy training due to the followings

Conflicting elective commitments

Conflicting emergency commitments

Absence of allocated training lists

Competition from surgical trainees

I do not wish to train in endoscopy

Other (please specify)

## 27. Do you feel your training will allow you to practise as a consultant in the following

UGI endoscopy

Colonoscopy

Other (please specify)

## 28. Do you follow the new ESPGHAN training syllabus

YES

NO

Other (please specify)

# ESPGHAN Endoscopy training survey

## \*29. Do you want ESPGHAN to organize endoscopy summer schools

YES

NO

Other (please specify)

## \*30. Do you want ESPGHAN school to organize a basic endoscopy skills courses ?

YES

NO

Other (please specify)

## \*31. Do you want ESPGHAN to be responsible of the accreditation of endoscopy centres ?

YES

NO

Other (please specify)

## 32. Please tell us how ESPGHAN in collaboration with national societies can improve your endoscopy training



# ESPGHAN Endoscopy training survey

please promote to colleagues and join the ever growing ESPGHAN Trainee Membership is open to clinicians training in paediatric gastroenterology, hepatology and nutrition who can apply for ESPGHAN trainee membership for very low rates. Trainee membership currently lasts for three years (an extension to 5 years is currently considered), thereafter to continue to be an ESPGHAN member you should apply for full membership. To qualify for full membership you need to have presented your research at an ESPGHAN, UEGW or FISPGHAN meeting.

Benefits include:

1. Participation in training and research courses such as the forthcoming ESPGHAN Summer Schools and Young Investigator Forums
2. Reduced registration fees at ESPGHAN Annual Meetings, and the opportunity to receive an ESPGHAN Young Investigator Travel Award if you have an accepted abstract.
3. Free access to ESPGHAN educational modules on the UEG eLearning platform at [www.e-learning.ueg.eu](http://www.e-learning.ueg.eu) and at the Early Nutrition eAcademy platform at [www.early-nutrition.org/enea.html](http://www.early-nutrition.org/enea.html)
4. Opportunity to participate as faculty in ESPGHAN postgraduate activities and boost your CV and presentation skills (costs covered by ESPGHAN)
5. Opportunity to become a trainee representative in one of the three ESPGHAN scientific committee's on Gastroenterology, Hepatology, and Nutrition, respectively, with participation in development of guidelines and position papers
6. Potential to become a reviewer for JPGN and boost your critical appraisal skills and your CV
7. Opportunity to get grants for research, courses and travel e.g through the ESPGHAN-NASPGHAN Travel Award, the ESPGHAN International Exchange Programme, and the Charlotte Anderson Travel Award.
8. Receipt of the monthly "ESPGHAN What's New Newsletter" with current information in the area of paediatric gastroenterology, hepatology and nutrition, as well as regular Trainee Committee updates

Your next steps:

The cost of Trainee Membership is only €60/year (without subscription to the Journal of Pediatric Gastroenterology and Nutrition, JPGN). Online access and print copies of the JPGN are available for an additional fee of only €25/year (normal trainee individual subscription is \$50/year) .

Complete the registration form available at [www.espghan.org](http://www.espghan.org) and send it today to the Society Offices with your CV and a letter of support from an active ESPGHAN member. In case you do not know an ESPGHAN member please contact the Society Offices to obtain help.

Deadline : every year by 1st of February

Thank you very much for participating in this survey

Yours sincerely

ESPGHAN Trainee Committee

# ESPGHAN Endoscopy training survey

please promote to colleagues and join the ever growing ESPGHAN Trainee Membership

is open to clinicians training in paediatric gastroenterology, hepatology and nutrition who can apply for ESPGHAN trainee membership for very low rates. Trainee membership currently lasts for three years (an extension to 5 years is currently considered), thereafter to continue to be an ESPGHAN member you should apply for full membership. To qualify for full membership you need to have presented your research at an ESPGHAN, UEGW or FISPGHAN meeting.

Benefits include:

1. Participation in training and research courses such as the forthcoming ESPGHAN Summer Schools and Young Investigator Forums
2. Reduced registration fees at ESPGHAN Annual Meetings, and the opportunity to receive an ESPGHAN Young Investigator Travel Award if you have an accepted abstract.
3. Free access to ESPGHAN educational modules on the UEG eLearning platform at [www.e-learning.ueg.eu](http://www.e-learning.ueg.eu) and at the Early Nutrition eAcademy platform at [www.early-nutrition.org/enea.html](http://www.early-nutrition.org/enea.html)
4. Opportunity to participate as faculty in ESPGHAN postgraduate activities and boost your CV and presentation skills (costs covered by ESPGHAN)
5. Opportunity to become a trainee representative in one of the three ESPGHAN scientific committee's on Gastroenterology, Hepatology, and Nutrition, respectively, with participation in development of guidelines and position papers
6. Potential to become a reviewer for JPGN and boost your critical appraisal skills and your CV
7. Opportunity to get grants for research, courses and travel e.g through the ESPGHAN-NASPGHAN Travel Award, the ESPGHAN International Exchange Programme, and the Charlotte Anderson Travel Award.
8. Receipt of the monthly "ESPGHAN What's New Newsletter" with current information in the area of paediatric gastroenterology, hepatology and nutrition, as well as regular Trainee Committee updates

Your next steps:

The cost of Trainee Membership is only €60/year (without subscription to the Journal of Pediatric Gastroenterology and Nutrition, JPGN).

Online access and print copies of the JPGN are available for an additional fee of only €25/year (normal trainee individual subscription is \$50/year) .

Complete the registration form available at [www.espghan.org](http://www.espghan.org) and send it today to the Society Offices with your CV and a letter of support from an active ESPGHAN member. In case you do not know an ESPGHAN member please contact the Society Offices to obtain help.
