# Supplementary material
Source: PubMed Central journal article supplement (PMC6540272)
Supplement: flgastro-2018-101007supp002.pdf [file flgastro-2018-101007supp002.pdf]

**Table S2:** Procedural volume of (interventional) endoscopic procedures of trainee alumni sorted by country (OGD: oesophagogastroduodenoscopy, IC: ileocolonoscopy, VCE: video capsule endoscopy, PEG(J): percutaneous endoscopic gastrostomy (gastrojejunoscopy), ERCP: endoscopic retrograde cholangiopancreatography)

| Country        | OGD          | IC          | variceal banding | sclerotherapy | balloon dilatation | stricture dilatation | foreign body retrieval | Bravo® probe placement | endoscopic VCE placement | VCE         | PEG insertion | PEG change  | PEGJ placement | polypectomy | rectal biopsy | ERCP       | double balloon enteroscopy |
|----------------|--------------|-------------|------------------|---------------|--------------------|----------------------|------------------------|------------------------|--------------------------|-------------|---------------|-------------|----------------|-------------|---------------|------------|----------------------------|
| Albania        | 200          | 100         | 0                | 0             | 0                  | 0                    | 0                      | 0                      | 0                        | 0           | 0             | 0           | 0              | 5           | 20            | 0          | 0                          |
| Albania        | 150          | 30          | 0                | 0             | 0                  | 0                    | 0                      | 0                      | 0                        | 0           | 0             | 0           | 0              | 0           | 0             | 0          | 0                          |
| Austria        | 200          | 30          | 3                | 0             | 1                  | 1                    | 0                      | 0                      | 0                        | 0           | 0             | 1           | 2              | 0           | 0             | 0          | 0                          |
| Belgium        | 150          | 75          | 0                | 0             | 0                  | 0                    | 0                      | 0                      | 0                        | 0           | 2             | 0           | 0              | 5           | 0             | 0          | 0                          |
| Croatia        | 200          | 0           | 0                | 0             | 2                  | 0                    | 2                      | 0                      | 0                        | 0           | 0             | 0           | 0              | 0           | 0             | 0          | 0                          |
| Denmark        | 100          | 0           | 0                | 0             | 0                  | 0                    | 0                      | 0                      | 0                        | 0           | 0             | 0           | 0              | 0           | 0             | 0          | 0                          |
| Finland        | 250          | 180         | 0                | 0             | 0                  | 0                    | 0                      | 0                      | 15                       | 100         | 0             | 0           | 0              | 13          | 30            | 0          | 0                          |
| Germany        | 75           | 20          | 3                | 0             | 0                  | 0                    | 2                      | 0                      | 0                        | 0           | 5             | 3           | 1              | 2           | 0             | 0          | 0                          |
| Germany        | 350          | 250         | 5                | 0             | 0                  | 0                    | 40                     | 0                      | 5                        | 20          | 50            | 30          | 5              | 10          | 0             | 0          | 0                          |
| Germany        | 300          | 100         | 0                | 0             | 0                  | 0                    | 20                     | 0                      | 3                        | 0           | 30            | 20          | 3              | 10          | 20            | 0          | 0                          |
| Germany        | 90           | 25          | 6                | 0             | 1                  | 0                    | 3                      | 0                      | 0                        | 0           | 6             | 6           | 2              | 3           | 0             | 0          | 0                          |
| Germany        | 600          | 200         | 15               | 3             | 5                  | 0                    | 25                     | 100                    | 0                        | 5           | 50            | 50          | 15             | 15          | 50            | 0          | 0                          |
| Germany        | 150          | 75          | 0                | 0             | 7                  | 0                    | 4                      | 0                      | 3                        | 4           | 10            | 25          | 0              | 5           | 3             | 0          | 0                          |
| Germany        | 300          | 150         | 10               | 0             | 0                  | 0                    | 10                     | 10                     | 10                       | 0           | 20            | 10          | 20             | 20          | 20            | 0          | 0                          |
| Greece         | 200          | 150         | 0                | 0             | 0                  | 0                    | 20                     | 0                      | 5                        | 20          | 0             | 0           | 0              | 15          | 0             | 0          | 0                          |
| Greece         | 150          | 70          | 0                | 0             | 0                  | 0                    | 1                      | 0                      | 0                        | 0           | 1             | 0           | 0              | 10          | 0             | 0          | 0                          |
| Israel         | 400          | 70          | 6                | 4             | 40                 | 50                   | 40                     | 0                      | 15                       | 10          | 60            | 30          | 4              | 10          | 10            | 5          | 0                          |
| Portugal       | 0            | 0           | 0                | 0             | 0                  | 0                    | 0                      | 0                      | 0                        | 0           | 0             | 0           | 0              | 0           | 0             | 0          | 0                          |
| Portugal       | 150          | 10          | 2                | 0             | 3                  | 3                    | 5                      | 0                      | 0                        | 0           | 0             | 0           | 0              | 3           | 0             | 0          | 0                          |
| Spain          | 150          | 100         | 2                | 3             | 0                  | 0                    | 15                     | 0                      | 3                        | 5           | 5             | 10          | 2              | 15          | 2             | 0          | 0                          |
| Spain          | 250          | 35          | 0                | 0             | 0                  | 0                    | 0                      | 0                      | 0                        | 0           | 1             | 1           | 0              | 0           | 0             | 0          | 0                          |
| Spain          | 400          | 100         | 3                | 1             | 50                 | 10                   | 30                     | 0                      | 0                        | 0           | 30            | 30          | 2              | 30          | 0             | 0          | 0                          |
| Sweden         | 250          | 35          | 0                | 0             | 0                  | 0                    | 0                      | 0                      | 0                        | 0           | 1             | 1           | 0              | 0           | 0             | 0          | 0                          |
| Sweden         | 50           | 50          | 0                | 0             | 0                  | 0                    | 0                      | 0                      | 0                        | 0           | 0             | 0           | 0              | 0           | 0             | 0          | 0                          |
| Switzerland    | 300          | 100         | 50               | 15            | 15                 | 0                    | 35                     | 5                      | 3                        | 15          | 50            | 30          | 0              | 10          | 1             | 0          | 0                          |
| Switzerland    | 250          | 150         | 5                | 0             | 15                 | 0                    | 10                     | 0                      | 0                        | 0           | 25            | 20          | 3              | 10          | 0             | 0          | 0                          |
| UK             | 500          | 250         | 0                | 0             | 25                 | 0                    | 5                      | 0                      | 5                        | 0           | 15            | 5           | 0              | 20          | 0             | 0          | 0                          |
| UK             | 400          | 70          | 0                | 0             | 12                 | 12                   | 4                      | 200                    | 0                        | 0           | 0             | 25          | 0              | 5           | 0             | 0          | 0                          |
| UK             | 103          | 10          | 0                | 0             | 0                  | 0                    | 0                      | 0                      | 0                        | 0           | 0             | 0           | 0              | 0           | 0             | 0          | 0                          |
| UK             | 200          | 150         | 10               | 10            | 10                 | 19                   | 10                     | 10                     | 5                        | 2           | 50            | 30          | 5              | 130         | 0             | 5          | 2                          |
| UK             | 270          | 80          | 3                | 0             | 0                  | 0                    | 0                      | 0                      | 0                        | 0           | 10            | 10          | 0              | 2           | 0             | 0          | 0                          |
| <b>AVERAGE</b> | <b>230.3</b> | <b>86.0</b> | <b>4.0</b>       | <b>1.2</b>    | <b>6.0</b>         | <b>3.1</b>           | <b>9.1</b>             | <b>10.5</b>            | <b>2.3</b>               | <b>5.8</b>  | <b>13.6</b>   | <b>10.9</b> | <b>2.1</b>     | <b>11.2</b> | <b>5.0</b>    | <b>0.3</b> | <b>0.1</b>                 |
| <b>STDEV</b>   | <b>133.4</b> | <b>70.4</b> | <b>9.3</b>       | <b>3.3</b>    | <b>12.1</b>        | <b>9.7</b>           | <b>12.7</b>            | <b>39.5</b>            | <b>4.2</b>               | <b>18.4</b> | <b>19.3</b>   | <b>13.9</b> | <b>4.4</b>     | <b>23.3</b> | <b>11.4</b>   | <b>1.2</b> | <b>0.4</b>                 |
| <b>MEDIAN</b>  | <b>200</b>   | <b>75</b>   | <b>0</b>         | <b>0</b>      | <b>0</b>           | <b>0</b>             | <b>3</b>               | <b>0</b>               | <b>0</b>                 | <b>0</b>    | <b>2</b>      | <b>3</b>    | <b>0</b>       | <b>5</b>    | <b>0</b>      | <b>0</b>   | <b>0</b>                   |
| <b>Q1</b>      | <b>150</b>   | <b>30</b>   | <b>0</b>         | <b>0</b>      | <b>0</b>           | <b>0</b>             | <b>0</b>               | <b>0</b>               | <b>0</b>                 | <b>0</b>    | <b>0</b>      | <b>0</b>    | <b>0</b>       | <b>0</b>    | <b>0</b>      | <b>0</b>   | <b>0</b>                   |
| <b>Q3</b>      | <b>300</b>   | <b>150</b>  | <b>5</b>         | <b>0</b>      | <b>7</b>           | <b>0</b>             | <b>15</b>              | <b>0</b>               | <b>3</b>                 | <b>4</b>    | <b>25</b>     | <b>25</b>   | <b>2</b>       | <b>13</b>   | <b>2</b>      | <b>0</b>   | <b>0</b>                   |
